# Supplementary material
Source: PubMed Central journal article supplement (PMC7334838)
Supplement: NIHMS1603333-supplement-Supplemental_data.pdf [file NIHMS1603333-supplement-Supplemental_data.pdf]

## Supporting Information

### Mass Spectral Feature List Optimizer (MS-FLO):

#### a tool to minimize false positive peak reports in untargeted LC-MS data processing

Brian C. DeFelice<sup>1</sup>, Sajjan Singh Mehta<sup>1</sup>, Stephanie Samra<sup>1</sup>, Tomáš Čajka<sup>1</sup>, Benjamin Wancewicz<sup>1</sup>, Johannes F. Fahrman<sup>1,2</sup>, Oliver Fiehn<sup>1,3</sup>

<sup>1</sup> *University of California, Davis, West Coast Metabolomics Center, 451 E. Health Sciences Drive Rm 1300, Davis, California, 95616, United States*

<sup>2</sup> *Department of Clinical Cancer Prevention, University of Texas MD Anderson Cancer Center, 6767 Bertner Avenue Houston, TX 77030-2603*

<sup>3</sup> *Department of Biochemistry, Faculty of Sciences, King Abdulaziz University, Abdullah Sulayman, Jeddah 21589, Saudi Arabia*

Oliver Fiehn, E-mail: [ofiehn@ucdavis.edu](mailto:ofiehn@ucdavis.edu)

### Contents

**S1:** Data processing parameters used for MZmine2 and MS-DIAL

**S2:** Formatting datasets for MS-FLO use

**Table S1:** Study information, sample MS and LC parameters, and metadata.

**Figure S1:** Example of potential duplicate peaks detected by MS-FLO.

**Figure S2:** Example of potential isotopic pairs detected by MS-FLO

**Figure S3:** Examples of Adduct Joining/Flagging

**Figure S4:** The user interface of MS-FLOs four primary modules and the recommended default settings.

**Figure S5:** Variation in ratio of ion adducts from sample to sample

## S1

In order to tailor the data processing parameters to specific sample matrices and the respective LC-MS methods used for analysis small modifications were made to the following general data processing parameters. Studies processed with MZmine2 used the following parameters or slightly modified variations of the following parameters: 1) Files were centroided and peak heights below 100 intensity counts were considered noise and removed when converting to the .mzXML data format. 2) Mass detection threshold was set to a peak height of 1000. 3) Chromatogram builder m/z tolerance, 0.005 Da; RT tolerance, 0-60s. 4) Deconvolution algorithm used was 'local minimum search' with the following settings: chromatographic threshold, 40%; minimum retention time range, 1.0 min; absolute peak height, 1000; minimum ratio of top or edge, 1.8; peak duration, 0-1.5 min. 5) Samples were ordered as such: study samples, quality control samples, and blanks and aligned using the join aligner. Join aligner settings: m/z tolerance, 0.005 or 50ppm; weight for m/z, 30; RT tolerance, 0.2 min; weight for RT, 35. 6) Identification was performed by accurate mass-RT database matching, from an in-house database created from MS/MS annotation and injection of authentic standards.

MS-DIAL studies were processed using the following parameters or slight modifications of those parameters depending on LC-MS and matrix conditions: 1) Data files were converted to the .abf format. 2) Smoothing method, linear weighted moving average smoothing; smoothing level, 1 scan; minimum peak width, 5 scans; minimum peak height, 3000 amplitude; mass slice width, 0.1 Da. 3) Deconvolution parameters: band width, 5 scans; segment number, 1; peak consideration, both; sigma window value, 0.001 min. 4) Identification was performed by accurate mass-RT database matching, and adducts were selected based on LC-MS system used. 5) Alignment parameter tab settings: RT tolerance, 0.1 min; MS1 tolerance, 0.025 Da; RT factor, 0.5; MS1 factor, 0.5; peak count filter, 30%.

## S2

*MZmine .csv Export Format.* Data processed with MZmine should be exported using a comma as a field separator. All common elements (row ID, row m/z, row retention time, row comment and row number of detected peaks) and identity elements should be checked and exported. Additionally, 'Export peak height' should be checked. .csv files exported in this fashion can be directly submitted to MS-FLO

*Submitting Non-MZmine/MS-DIAL/XCMS Datasets to MS-FLO.* There are three column headers required for any .csv file to be recognized by MS-FLO's MZmine configuration: "row m/z", "row retention time" and "peak height". The columns titled "row m/z" and "row retention time" must contain mass-to-charge ratio and retention time information respectively. All columns containing sample height information must contain the phrase "peak height". For example, a column containing peak height information for 'Sample 1' should be renamed, 'Sample 1 peak height'. All of the above mentioned .csv file modifications can be performed in any cell based program such as MS Excel or Open Office.

**Table S1**

| <b>study description</b>                                                                    | <b>dataset number</b> | <b>LC method</b> | <b>data processing program</b> |
|---------------------------------------------------------------------------------------------|-----------------------|------------------|--------------------------------|
| Allantoin differences in Synechococcus cells grown in high versus low lightgrowth           | 1                     | Lipids (+)       | MZmine 2                       |
| Analysis of various points along the canine gastrointestinal tract                          | 2                     | HILIC (+)        | MZmine 2                       |
| Changes in the metabolome and lipidome in response to exercise training                     | 3                     | Lipids (+)       | MS-DIAL                        |
| Changes in the metabolome and lipidome in response to exercise training                     | 4                     | Lipids (-)       | MS-DIAL                        |
| Crude Algae Oil                                                                             | 5                     | Lipids (+)       | MZmine 2                       |
| Effects of dietary supplement on hamster metabolism                                         | 6                     | Lipids (+)       | MS-DIAL                        |
| Effects of dietary supplement on hamster metabolism                                         | 7                     | Lipids (-)       | MS-DIAL                        |
| Effects of the probiotic "LGG" on gut metabolism of alcoholics                              | 8                     | Lipids (-)       | MZmine 2                       |
| Effects of the probiotic "LGG" on gut metabolism of alcoholics                              | 9                     | Lipids (+)       | MZmine 2                       |
| Identification and validation of interstitial cystitis/painful bladder syndrome metabolites | 10                    | Reverse Ph       | MZmine 2                       |
| Metabolite changes associated with methionine stress sensitivity of cancer                  | 11                    | Lipids (-)       | MZmine 2                       |
| Metabolite changes associated with methionine stress sensitivity of cancer                  | 12                    | Lipids (+)       | MZmine 2                       |
| Metabolite comparison of mouse gastric tissue and glands                                    | 13                    | Lipids (-)       | MS-DIAL                        |
| Metabolite comparison of mouse gastric tissue and glands                                    | 14                    | Lipids (+)       | MS-DIAL                        |
| Metabolites detected from human bronchoalveolar lavage of varying asthma severities         | 15                    | Lipids (-)       | MS-DIAL                        |
| Metabolites detected from human bronchoalveolar lavage of varying asthma severities         | 16                    | Lipids (+)       | MS-DIAL                        |
| Metformin effects on liver and kidney tissue                                                | 17                    | HILIC (+)        | MZmine 2                       |
| NOD diabetic mice progressors vs nonprogressors                                             | 18                    | Lipids (-)       | MZmine 2                       |
| NOD diabetic mice progressors vs nonprogressors                                             | 19                    | Lipids (+)       | MZmine 2                       |
| Progesterone level effects on primary metabolites in uterus, blood, and ovaries (Follicle)  | 20                    | Lipids (+)       | MZmine 2                       |
| Progesterone level effects on primary metabolites in uterus, blood, and ovaries (Plasma)    | 21                    | Lipids (+)       | MZmine 2                       |
| Renal metabolic pathways indicating ischemic or inflammatory changes                        | 22                    | Lipids (-)       | MS-DIAL                        |
| Renal metabolic pathways indicating ischemic or inflammatory changes                        | 23                    | Lipids (+)       | MS-DIAL                        |
| Role of medium in bacterial growth                                                          | 24                    | Lipids (+)       | MZmine 2                       |
| Role of medium in bacterial growth                                                          | 25                    | Reverse Ph       | MZmine 2                       |
| Role of medium in bacterial growth                                                          | 26                    | HILIC (+)        | MZmine 2                       |
| Single treatment gene impact on Arabidopsis metabolites                                     | 27                    | Lipids (-)       | MZmine 2                       |
| Single treatment gene impact on Arabidopsis metabolites                                     | 28                    | Lipids (+)       | MZmine 2                       |

**Average****Standard Deviation****Table S1.** Details about studies, samples mass spectrometry parameters, LC parameters, and metadata.

| matrix                                            | workbench ID | sample count | initial   | final row count | rows removed | duplicates flagged | duplicates removed | adducts       |
|---------------------------------------------------|--------------|--------------|-----------|-----------------|--------------|--------------------|--------------------|---------------|
|                                                   |              |              | row count |                 |              |                    |                    | pairs flagged |
| synechococcus cells                               | ST000318     | 8            | 1263      | 1145            | 118          | 1                  | 1                  | 138           |
| canine colon, duodenum, ileum, rectum             | ST000327     | 24           | 2282      | 2260            | 22           | 78                 | 0                  | 6             |
| human blood plasma                                | ST000387     | 302          | 841       | 720             | 121          | 17                 | 2                  | 21            |
| human blood plasma                                | ST000387     | 302          | 1266      | 1170            | 96           | 119                | 42                 | 36            |
| algae                                             | ST000319     | 3            | 2806      | 2509            | 297          | 21                 | 11                 | 79            |
| spent media from DG44 chinese hamster ovary cells | ST000344     | 18           | 354       | 306             | 48           | 4                  | 0                  | 20            |
| spent media from DG44 chinese hamster ovary cells | ST000344     | 17           | 459       | 425             | 34           | 21                 | 0                  | 10            |
| mouse stool                                       | ST000321     | 36           | 1471      | 1335            | 136          | 5                  | 4                  | 47            |
| mouse stool                                       | ST000321     | 36           | 1441      | 1364            | 77           | 5                  | 4                  | 8             |
| human urine                                       | ST000382     | 100          | 1364      | 1284            | 80           | 19                 | 34                 | 63            |
| human cancer cells                                | ST000077     | 35           | 1068      | 922             | 146          | 6                  | 0                  | 35            |
| human cancer cells                                | ST000077     | 35           | 756       | 728             | 28           | 2                  | 0                  | 6             |
| mouse stomach tissues                             | ST000354     | 22           | 2171      | 1896            | 275          | 34                 | 0                  | 175           |
| mouse stomach tissues                             | ST000354     | 26           | 1595      | 1505            | 90           | 31                 | 1                  | 25            |
| human bronchoalveolar lavage fluid                | ST000346     | 20           | 412       | 367             | 45           | 8                  | 1                  | 22            |
| human bronchoalveolar lavage fluid                | ST000346     | 17           | 181       | 173             | 8            | 4                  | 0                  | 2             |
| Mouse Liver and Kidney                            | ST000340     | 23           | 744       | 725             | 19           | 1                  | 0                  | 24            |
| blood plasma                                      | ST000075     | 85           | 663       | 609             | 54           | 6                  | 1                  | 23            |
| blood plasma                                      | ST000075     | 85           | 128       | 123             | 5            | 1                  | 0                  | 0             |
| cow preovulatory follicle fluid                   | ST000324     | 12           | 1155      | 1091            | 64           | 9                  | 8                  | 24            |
| cow blood plasma                                  | ST000322     | 88           | 1125      | 1070            | 55           | 8                  | 13                 | 9             |
| human renal tissue                                | ST000342     | 37           | 939       | 824             | 115          | 17                 | 0                  | 57            |
| human renal tissue                                | ST000342     | 37           | 356       | 333             | 23           | 12                 | 0                  | 1             |
| bacterial culture medium                          | ST000317     | 21           | 695       | 639             | 56           | 0                  | 0                  | 29            |
| bacterial culture medium                          |              | 22           | 1050      | 973             | 77           | 4                  | 5                  | 26            |
| bacterial culture medium                          | ST000326     | 24           | 546       | 501             | 45           | 7                  | 3                  | 13            |
| genetically modified arabidopsis                  | ST000320     | 22           | 498       | 463             | 35           | 1                  | 2                  | 6             |
| genetically modified arabidopsis                  | ST000320     | 24           | 246       | 245             | 1            | 1                  | 0                  | 0             |
|                                                   |              | 52.9         | 995.54    | 918.0           | 77.5         | 15.8               | 4.7                | 32.3          |
|                                                   |              | 74.6         | 657.0     | 605.2           | 71           | 25.7               | 10.1               | 40.5          |

| adduct rows<br>removed by<br>joining | possible<br>isotope<br>sets | possible isotope<br>w/ mean R <sup>2</sup> ><br>0.8 | total rows<br>auto-<br>removed | contaminant<br>ions removed |
|--------------------------------------|-----------------------------|-----------------------------------------------------|--------------------------------|-----------------------------|
| 117                                  | 41                          | 33                                                  | 118                            | 0                           |
| 0                                    | 7                           | 2                                                   | 22                             | 22                          |
| 119                                  | 33                          | 29                                                  | 121                            | 0                           |
| 54                                   | 161                         | 127                                                 | 96                             | 0                           |
| 285                                  | 76                          | 76                                                  | 297                            | 1                           |
| 48                                   | 9                           | 7                                                   | 48                             | 0                           |
| 34                                   | 3                           | 3                                                   | 34                             | 0                           |
| 132                                  | 73                          | 73                                                  | 136                            | 0                           |
| 73                                   | 26                          | 26                                                  | 77                             | 0                           |
| 45                                   | 72                          | 57                                                  | 80                             | 1                           |
| 146                                  | 17                          | 17                                                  | 146                            | 0                           |
| 28                                   | 11                          | 10                                                  | 28                             | 0                           |
| 275                                  | 158                         | 108                                                 | 275                            | 0                           |
| 89                                   | 38                          | 27                                                  | 90                             | 0                           |
| 44                                   | 12                          | 10                                                  | 45                             | 0                           |
| 8                                    | 2                           | 1                                                   | 8                              | 0                           |
| 19                                   | 37                          | 8                                                   | 19                             | 0                           |
| 53                                   | 25                          | 25                                                  | 54                             | 0                           |
| 5                                    | 1                           | 1                                                   | 5                              | 0                           |
| 56                                   | 71                          | 70                                                  | 64                             | 0                           |
| 42                                   | 66                          | 73                                                  | 55                             | 0                           |
| 115                                  | 31                          | 24                                                  | 115                            | 0                           |
| 23                                   | 1                           | 1                                                   | 23                             | 0                           |
| 50                                   | 2                           | 1                                                   | 56                             | 6                           |
| 70                                   | 14                          | 12                                                  | 77                             | 2                           |
| 29                                   | 19                          | 16                                                  | 45                             | 13                          |
| 33                                   | 28                          | 28                                                  | 35                             | 0                           |
| 1                                    | 1                           | 1                                                   | 1                              | 0                           |
| 71.2                                 | 37.0                        | 30.9                                                | 77.5                           | 1.6                         |
| 71.3                                 | 42.3                        | 34.4                                                | 71.2                           | 4.8                         |

# Figure S1

A)

| identifier   | row m/z  | row RT | duplicate_flag                                         | SA001  | SA002  | SA003  | SA004  | SA005  | SA006  |
|--------------|----------|--------|--------------------------------------------------------|--------|--------|--------|--------|--------|--------|
| 10.42_855.73 | 855.7254 | 10.424 | Match #027                                             | 62058  | 27653  | 89721  | 45006  | 88199  | 97518  |
| 10.38_855.73 | 855.7344 | 10.38  | Match #027: Possible duplicate of 10.42_855.73 (84.3%) | 62058  | 27653  | 35486  | 45006  | 88199  | 97518  |
| 5.36_836.60  | 836.6032 | 5.359  | Match #043                                             | 133850 | 92005  | 143294 | 247214 | 172819 | 230682 |
| 5.54_836.61  | 836.6131 | 5.542  | Match #043: Possible duplicate of 5.36_836.60 (9.6%)   | 158999 | 111763 | 189850 | 289987 | 232118 | 270320 |

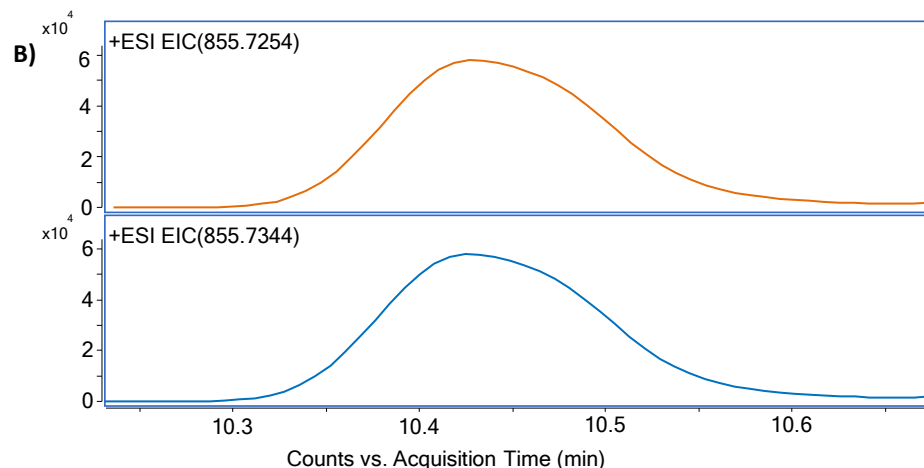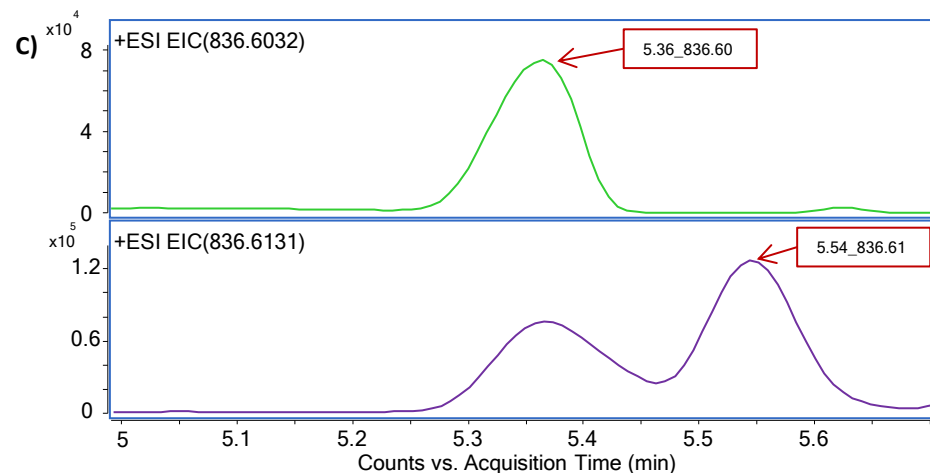

**Figure S1.** Examples of potential duplicate peaks detected by MS-FLO. **A)** Section of a .csv file exported from MS-FLO, showing flagged potential duplicate features, green features have been determined to be duplicates, red features have been determined to be unique features. **B)** Extracted ion chromatograms (*10mDa window*) representing two duplicate features that were misaligned, as separate features, in data processing; **blue:** 855.7344 and **gold:** 855.7254. **C)** Features 5.54\_836.61 and 5.36\_836.60 were flagged as potential duplicates due to their close RT and *m/z* proximity however once visually inspected it is clear they are separate features.

## Figure S2

A)

| identifier    | row m/z  | row rt | isotope_flag                                                                                   | Name                            | SA001  | SA002  | SA003  | SA004  |
|---------------|----------|--------|------------------------------------------------------------------------------------------------|---------------------------------|--------|--------|--------|--------|
| 5.04_719.5957 | 719.5957 | 5.036  | Match #045   Match #046                                                                        |                                 | 17117  | 18897  | 18782  | 20392  |
| 5.04_717.5895 | 717.5895 | 5.037  | Match #045: 5.04_719.60 = [M+H+2] w/R <sup>2</sup> = 0.852, dRT = 0.001, PHR = 0.109 +/- 0.004 | SM 17:0 [M+H] <sup>+</sup> ISTD | 157369 | 157613 | 173641 | 179912 |
| 5.04_718.5834 | 718.5834 | 5.037  | Match #046: 5.04_719.60 = [M+H+1] w/R <sup>2</sup> = 0.834, dRT = 0.001, PHR = 0.444 +/- 0.009 |                                 | 69842  | 70321  | 76664  | 81893  |

B)

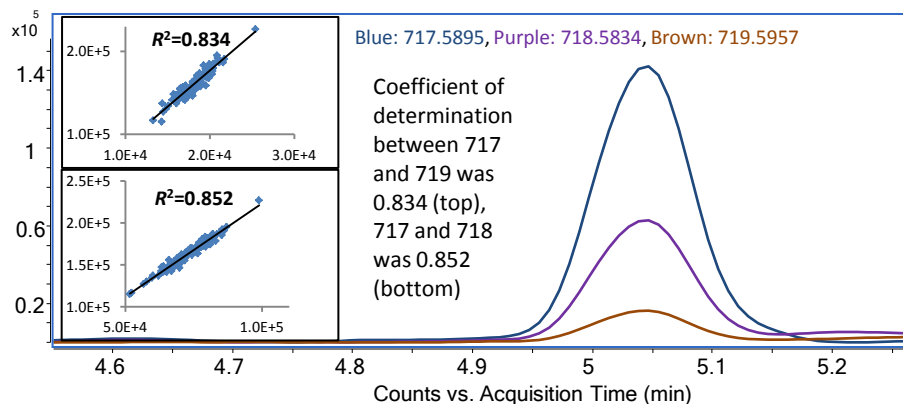

C)

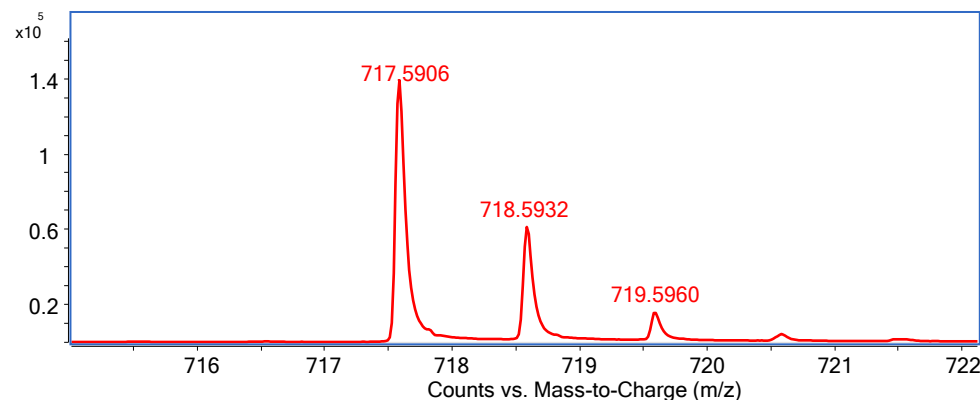

**Figure S2.** Example of potential isotopic pairs detected by MS-FLO **A)** Portion of a .csv file exported from MS-FLO, showing isotopic relationships of 3 features, including close RT and common isotopic peak height ratios (PHR). **B)** Extracted ion chromatograms for the three flagged masses Blue: 717.5895, Purple: 718.5834, Brown: 719.5957 (right). Graphical representation of the coefficient of determination between ions 717 and 719,  $R^2 = 0.834$  (left, top), 717 and 718  $R^2 = 0.852$  (left, bottom). **C)** Mass spectral data extracted from the apex of the three potentially isotopic peaks. Features identified as 5.04\_718.58 and 5.04\_719.60 were determined to be isotopic peaks and removed from the final feature list.



## Figure S3

A)

| identifier              | row m/z           | row rt      | adduct flag                                                                                     | Name                                        | SA001   | SA002  | SA003   | SA004   |
|-------------------------|-------------------|-------------|-------------------------------------------------------------------------------------------------|---------------------------------------------|---------|--------|---------|---------|
| 3.14_421.29             | 421.2934          | 3.143       | Match #088   Match #105                                                                         | DG (18:1/2:0/0:0) [M+Na] <sup>+</sup> ISTD  | 434329  | 468357 | 464535  | 439617  |
| 3.15_416.34             | 416.3372          | 3.147       | Match #088: [M+NH4] <sup>+</sup> -> [M+Na] <sup>+</sup> (3.14_421.29) w/R <sup>2</sup> = 0.348  | DG (18:1/2:0/0:0) [M+NH4] <sup>+</sup> ISTD | 213627  | 269120 | 275305  | 263421  |
| 3.14_399.31             | 399.3105          | 3.143       | Match #105: [M+H] <sup>+</sup> -> [M+Na] <sup>+</sup> (3.14_421.29) w/R <sup>2</sup> = 0.365    |                                             | 17263   | 17816  | 18225   | 16760   |
| 10.44_853.73            | 853.7263          | 10.44       | Match #111   Match #127                                                                         |                                             | 385640  | 146757 | 483379  | 278313  |
| 10.45_831.74            | 831.739           | 10.446      | Match #111: [M+H] <sup>+</sup> -> [M+Na] <sup>+</sup> (10.44_853.73) w/R <sup>2</sup> = 0.779   |                                             | 3939    | 2213   | 4124    | 2632    |
| 10.45_848.77            | 848.77            | 10.449      | Match #127: [M+NH4] <sup>+</sup> -> [M+Na] <sup>+</sup> (10.44_853.73) w/R <sup>2</sup> = 0.979 | TG (50:2) [M+NH4] <sup>+</sup>              | 2482847 | 751703 | 3604932 | 1777043 |
| 0.59_228.20_0.59_250.17 | 228.1954_250.1734 | 0.589_0.587 | Matched [M+H] <sup>+</sup> to [M+Na] <sup>+</sup> (0.59_250.17) w/R <sup>2</sup> = 0.942        |                                             | 37064   | 50056  | 93563   | 140345  |

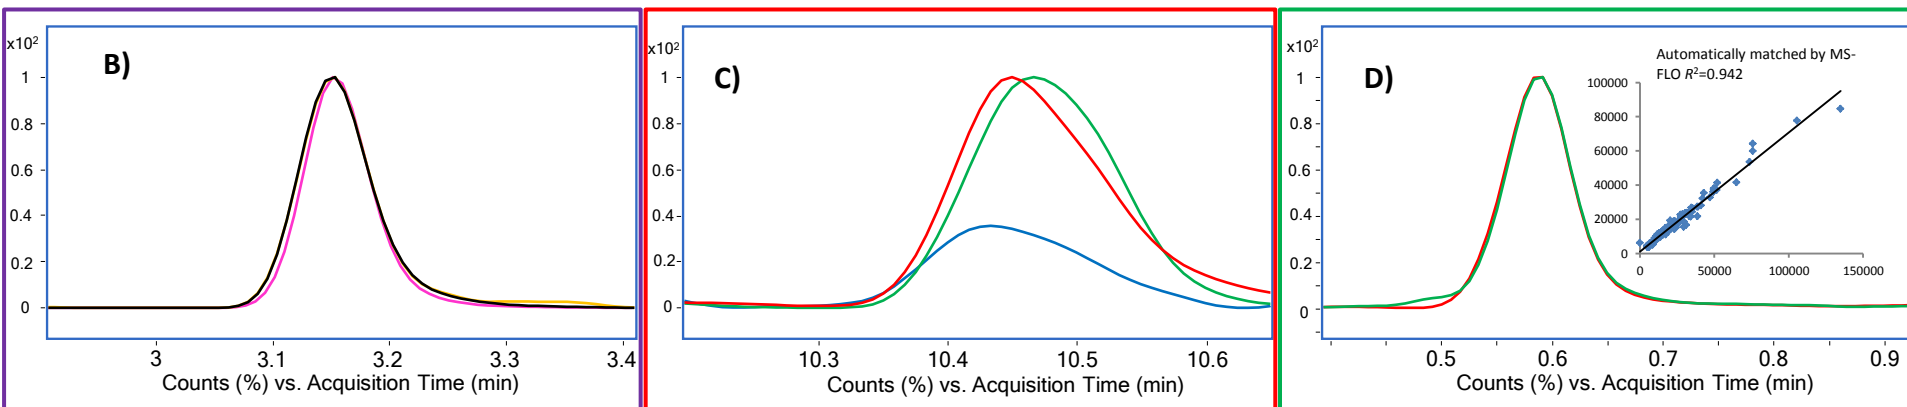

**Figure S3.** Examples of Adduct Joining/Flagging **A)** Excerpt of .csv file exported from MS-FLO showing adducts/molecular ions automatically matched (green text) and potential adducts flagged for manual review **B)** Extracted ion chromatograms (EICs) of multiple features **Orange: 399.3105**, **Pink: 416.3372**, **Black: 421.2934**. Despite the low  $R^2$  value ( $\sim 0.35$ ) these peaks are all adducts from the same molecule. **C)** EICs of 3 features that have been flagged as potential adducts; **Blue: 831.7390**, **Green: 848.7700**, **Red: 853.7263** These flagged features have a mass error of 10 mDa, and when the EICs are overlaid it is clear there is a RT shift. It is doubtful that these ions are all generated from the same molecule. **D)** EICs of two ions (**Red: 228.1953** **Green: 250.1774**) that were automatically joined by MS-FLO based on the user settings reveal the two features overlay. Additionally, the accurate mass difference between the theoretical (21.9787 Da) and experimental (21.9821 Da) masses corresponding to a  $[M+H]^+ \rightarrow [M+Na]^+$  ion transition is small (3.4 mDa) and the  $R^2$  value supports a very strong correlation.

# Figure S4

## A)

Duplicate Peak Removal:  
 Enabled

Tolerance for m/z:

Tolerance for Retention Time:

Peak Height Tolerance:

Absolute tolerance within which two peak heights are considered equal

Minimum Peak Match Ratio:

Minimum ratio of matched peak heights to total peak heights required for two rows to be considered duplicate

## B)

Isotope Detection:  
 Enabled

Tolerance for m/z:

Tolerance for Retention Time:

Minimum R<sup>2</sup> for Isotope Match:

Mass Shift:

## C)

Adduct Joiner:  
 Enabled

Tolerance for m/z:

Tolerance for Retention Time:

| Initial Adduct:                  | Final Adduct:                     | m/z Difference:                        | Flag Threshold:                  | Join Threshold:                  |
|----------------------------------|-----------------------------------|----------------------------------------|----------------------------------|----------------------------------|
| <input type="text" value="M+H"/> | <input type="text" value="M+Na"/> | <input type="text" value="21.981942"/> | <input type="text" value="0.0"/> | <input type="text" value="0.8"/> |

## D)

Contaminant Ion Removal:  
 Enabled

Tolerance for m/z:

Contaminant Ions:

Please list contaminant ions to be removed separated by commas, for example "121.0508, 922.00982"

**Figure S4.** The user interface of MS-FLOs four primary modules and the recommended default settings. **A)** Duplicate peak removal **B)** Isotope detection **C)** Adduct joiner **D)** Contaminant ion removal

**Figure S5**

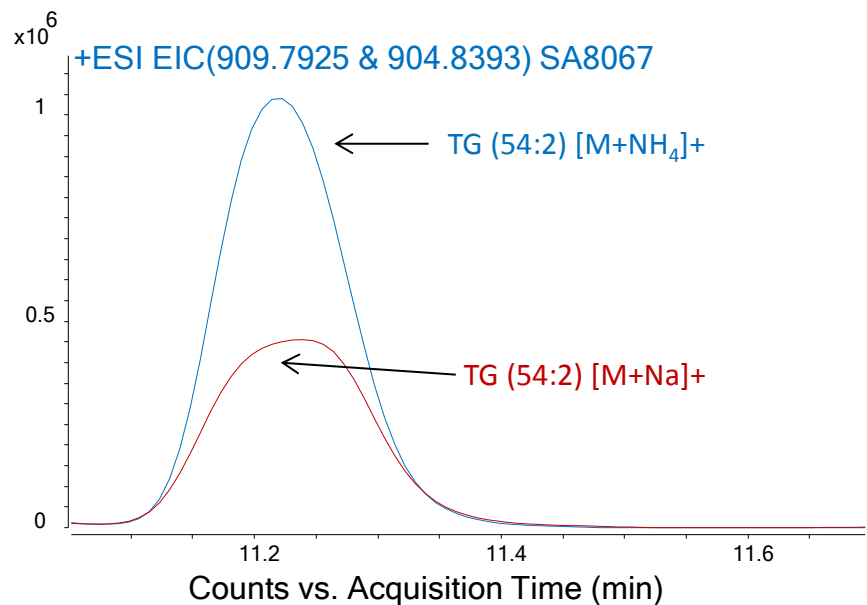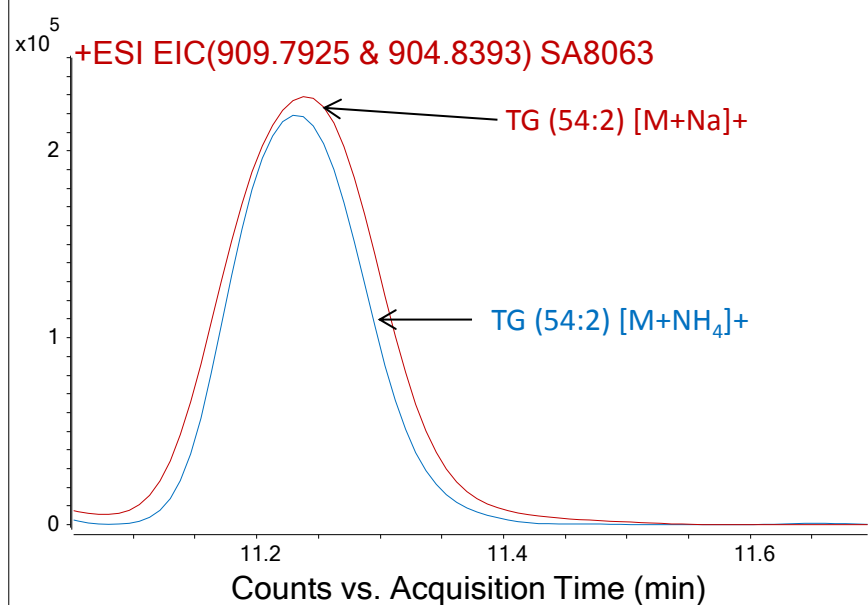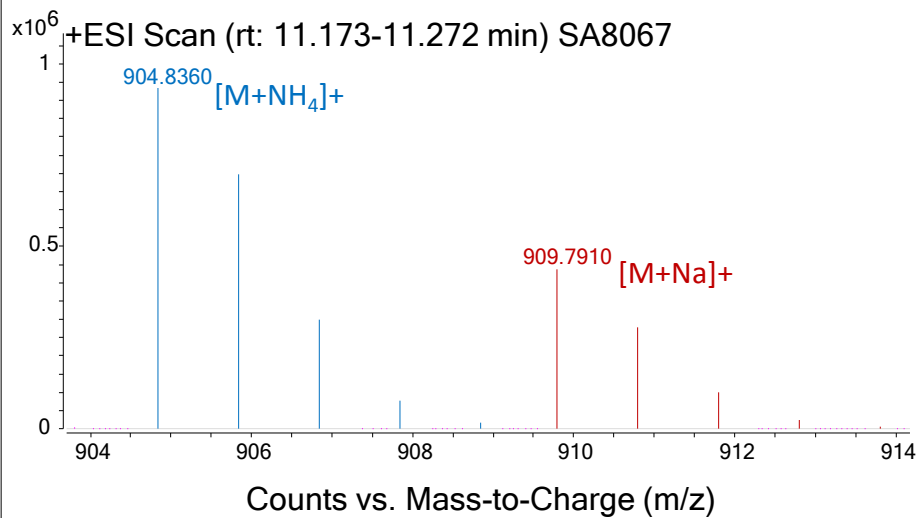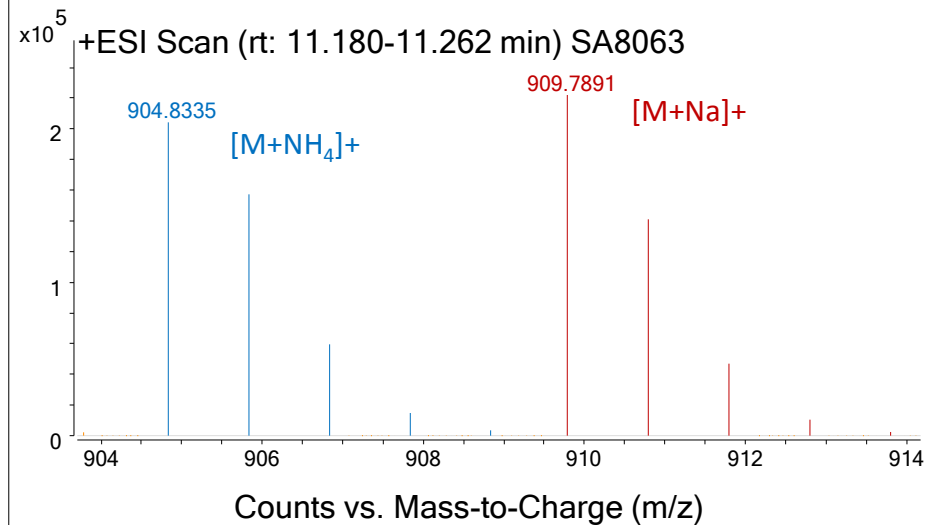

**Figure S5.** Variation in ratio of triacylglycerol ion adducts from sample to sample. Depending on metabolite abundance the peak height ratio of sodiated adduct to ammoniated adduct can vary greatly. Left: [M+NH<sub>4</sub>]<sup>+</sup> to [M+Na]<sup>+</sup> ratio is 1:0.44. Right: [M+NH<sub>4</sub>]<sup>+</sup> to [M+Na]<sup>+</sup> ratio is 0.97:1
